# Supplementary material for: Examining which clinicians provide admission hospital care in a high mortality setting and their adherence to guidelines: an observational study in 13 hospitals
Source: PubMed Central journal article supplement (PMC7361020; doi:10.1136/archdischild-2019-317256), 2020-03-12

Figure 1: Logic used for Malaria patients

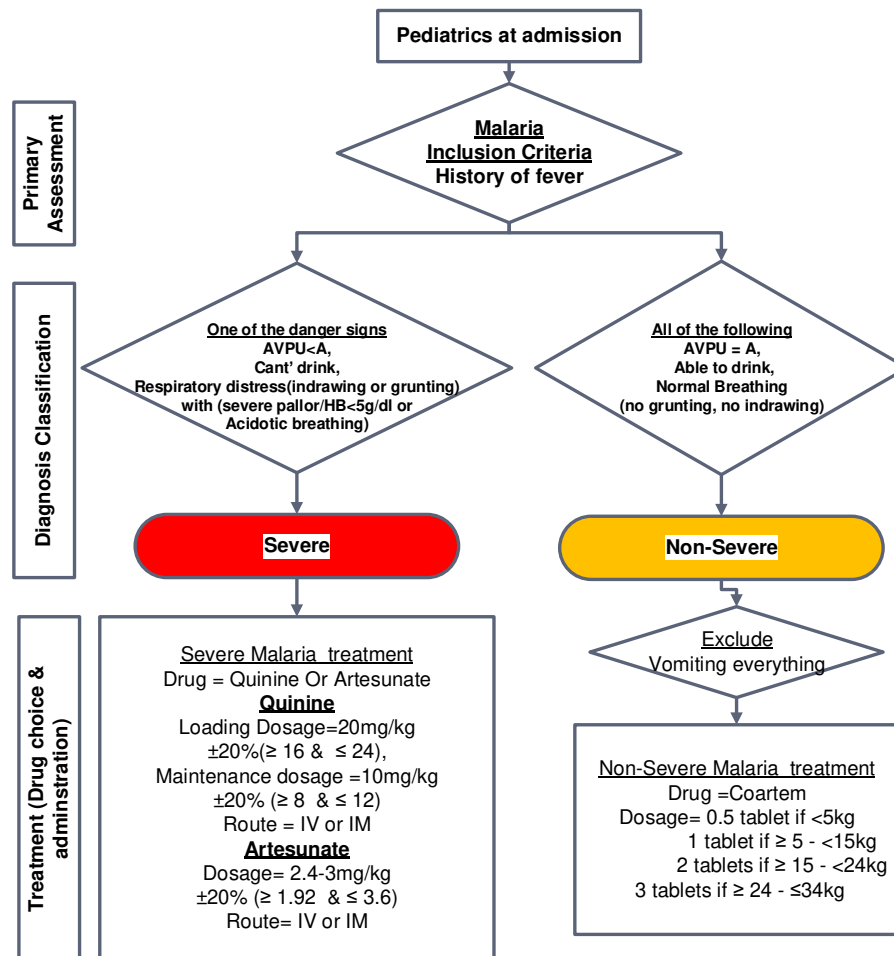

Figure 2: Logic used for Pneumonia patients

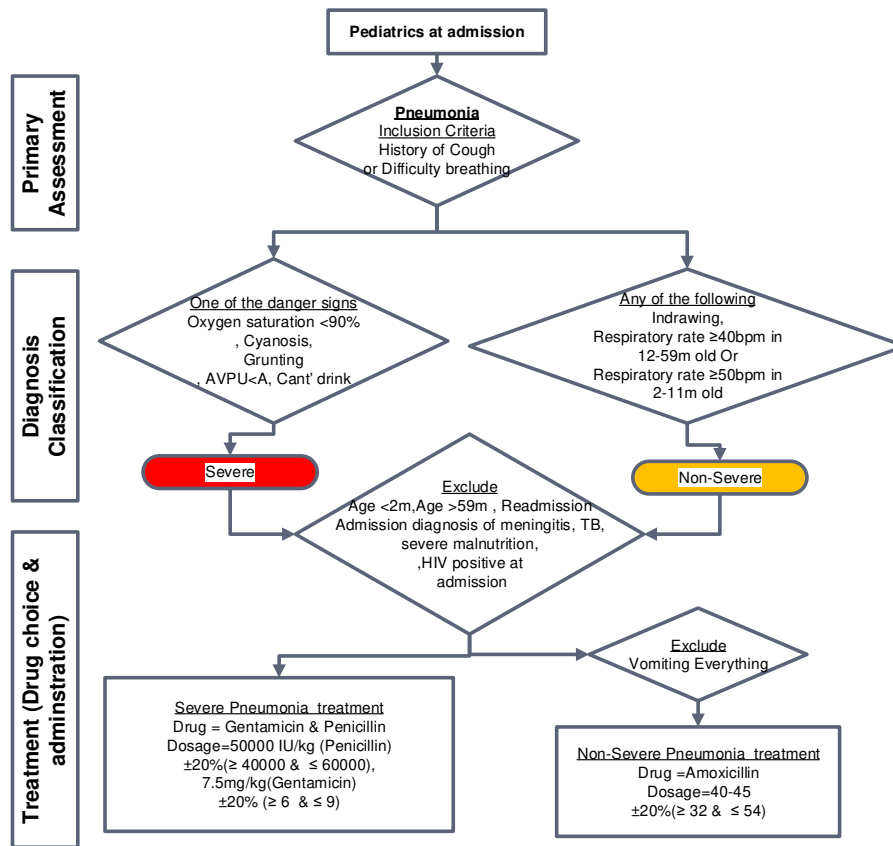

Figure 3: Logic used for diarrhea/dehydration patients

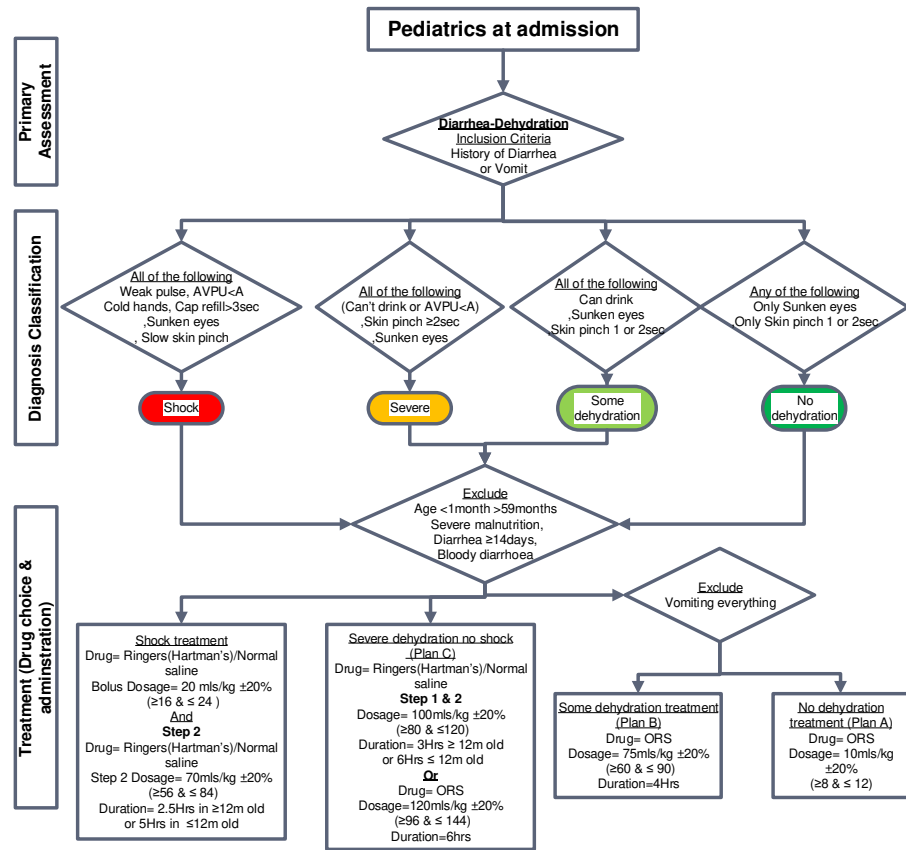

Supplement: archdischild-2019-317256supp001.pdf [file archdischild-2019-317256supp001.pdf]
