# Supplementary material for: Examining which clinicians provide admission hospital care in a high mortality setting and their adherence to guidelines: an observational study in 13 hospitals
Source: PubMed Central journal article supplement (PMC7361020; doi:10.1136/archdischild-2019-317256), 2020-03-12
Supplement: archdischild-2019-317256supp002.pdf [file archdischild-2019-317256supp002.pdf]

**Appendix Table 1: Malaria Cumulative Correctness of Pediatric Admission Quality of Care (cPAQC) score allocation table**

| Malaria                  |                                         |                                                                    |                                                                                                                     |
|--------------------------|-----------------------------------------|--------------------------------------------------------------------|---------------------------------------------------------------------------------------------------------------------|
| Domain                   | Domain details                          | Clinical task                                                      | Scoring criteria                                                                                                    |
| Primary assessment       | Fever documentation                     | Assess fever and document                                          | Score 1 if all items in Primary & secondary domains are documented                                                  |
| Secondary assessment     | Convulsions documentation               | Assess all signs and document                                      |                                                                                                                     |
|                          | Acidotic breathing documentation        |                                                                    |                                                                                                                     |
|                          | Ability to drink documentation          |                                                                    |                                                                                                                     |
|                          | AVPU documentation                      |                                                                    |                                                                                                                     |
|                          | Pallor documentation                    |                                                                    |                                                                                                                     |
|                          | Grunting documentation                  |                                                                    |                                                                                                                     |
| Complete assessment      | Indrawing documentation                 | Complete documentation of primary and secondary signs of malaria   |                                                                                                                     |
|                          | Primary & secondary assessment          |                                                                    |                                                                                                                     |
| Diagnosis classification | <b>Severe malaria</b>                   | Use clinical signs to classify malaria severity levels accordingly | Score 1 if there is a complete assessment of signs and malaria severity classification done according to guidelines |
|                          | <i>Fever plus any of the following:</i> |                                                                    |                                                                                                                     |
|                          | AVPU<A                                  |                                                                    |                                                                                                                     |
|                          | Inability to drink                      |                                                                    |                                                                                                                     |
|                          | Respiratory distress with severe anemia |                                                                    |                                                                                                                     |
|                          | Acidotic breathing                      |                                                                    |                                                                                                                     |
|                          | <b>Non- Severe malaria</b>              |                                                                    |                                                                                                                     |
|                          | <i>Fever plus all of the following:</i> |                                                                    |                                                                                                                     |
|                          | AVPU=A                                  |                                                                    |                                                                                                                     |
|                          | Can drink/breastfeed                    |                                                                    |                                                                                                                     |
|                          | No grunting                             |                                                                    |                                                                                                                     |
| No indrawing             |                                         |                                                                    |                                                                                                                     |
| Drug choice              | <b>Severe malaria drugs</b>             | Malaria drug prescriptions                                         | Score 1 if preceding clinical tasks and drug(s) are prescribed according to guidelines.                             |
|                          | Artesunate or                           |                                                                    |                                                                                                                     |
|                          | Quinine                                 |                                                                    |                                                                                                                     |
|                          | <b>Non-severe malaria drug</b>          |                                                                    |                                                                                                                     |
|                          | Coartem                                 |                                                                    |                                                                                                                     |

|                      |                                                                                                                                                           |                                                                  |                                                                                                      |
|----------------------|-----------------------------------------------------------------------------------------------------------------------------------------------------------|------------------------------------------------------------------|------------------------------------------------------------------------------------------------------|
| Drug use/application | <b>Severe malaria treatment</b>                                                                                                                           | Apply malaria drugs appropriately (correct dosage and frequency) | Score 1 if preceding clinical tasks are done according to guidelines and drugs applied appropriately |
|                      | Dose: Quinine loading dose $\geq 16$ - 24mls/kg                                                                                                           |                                                                  |                                                                                                      |
|                      | Dose: Quinine maintenance dose $\geq 8$ - 12 mls/kg<br>Frequency: 8hourly                                                                                 |                                                                  |                                                                                                      |
|                      | Dose: Artesunate $\geq 1.92$ - 3.6mls/kg                                                                                                                  |                                                                  |                                                                                                      |
|                      | <b>Non-severe malaria treatment</b>                                                                                                                       |                                                                  |                                                                                                      |
|                      | Dose:<br>0.5 tablet of coartem for $<5$ kgs<br>1 tablet of coartem for 5-15kgs<br>2 tablets of coartem for 15-24kgs<br>3 tablets of coartem for 24-34 kgs |                                                                  |                                                                                                      |
|                      |                                                                                                                                                           |                                                                  | <b>Maximum Malaria cPAQC Score=4</b>                                                                 |

**Appendix Table 2: Pneumonia Cumulative Correctness of Pediatric Admission Quality of Care (cPAQC) score allocation table**

| <b>Pneumonia</b>         |                                                                                         |                                                                      |                                                                                                                       |
|--------------------------|-----------------------------------------------------------------------------------------|----------------------------------------------------------------------|-----------------------------------------------------------------------------------------------------------------------|
| <b>Domain</b>            | <b>Domain details</b>                                                                   | <b>Clinical task</b>                                                 | <b>Scoring criteria</b>                                                                                               |
| Primary assessment       | Cough OR difficult breathing                                                            | Assessment and documentation of cough or difficult breathing         | Score 1 if all items in Primary & secondary domains are documented                                                    |
| Secondary assessment     | Cyanosis                                                                                | Assess all signs and document                                        |                                                                                                                       |
|                          | Ability to drink                                                                        |                                                                      |                                                                                                                       |
|                          | AVPU                                                                                    |                                                                      |                                                                                                                       |
|                          | Respiratory rate                                                                        |                                                                      |                                                                                                                       |
|                          | Grunting                                                                                |                                                                      |                                                                                                                       |
|                          | Indrawing                                                                               |                                                                      |                                                                                                                       |
| Complete assessment      | Primary & secondary assessment                                                          | Complete documentation of primary and secondary signs of pneumonia   |                                                                                                                       |
| Diagnosis classification | <b>Severe Pneumonia</b>                                                                 | Use clinical signs to classify pneumonia severity levels accordingly | Score 1 if there is a complete assessment of signs and pneumonia severity classification done according to guidelines |
|                          | <i>Cough or difficult breathing plus any of the following:</i>                          |                                                                      |                                                                                                                       |
|                          | Oxygen saturation < 90%                                                                 |                                                                      |                                                                                                                       |
|                          | Cyanosis                                                                                |                                                                      |                                                                                                                       |
|                          | Grunting                                                                                |                                                                      |                                                                                                                       |
|                          | Grunting                                                                                |                                                                      |                                                                                                                       |
|                          | AVPU < A                                                                                |                                                                      |                                                                                                                       |
|                          | Inability to drink                                                                      |                                                                      |                                                                                                                       |
|                          | <b>Non- Severe Pneumonia</b>                                                            |                                                                      |                                                                                                                       |
|                          | <i>Cough or difficult breathing plus any of the following:</i>                          |                                                                      |                                                                                                                       |
|                          | Indrawing,                                                                              |                                                                      |                                                                                                                       |
|                          | Respiratory rate $\geq 40$ in 12-59 months or Respiratory rate $\geq 50$ in 2-11 Months |                                                                      |                                                                                                                       |
| Drug choice              | <b>Severe pneumonia drugs</b>                                                           | Pneumonia drug prescriptions                                         | Score 1 if preceding clinical tasks and drug(s) are prescribed according to guidelines                                |
|                          | Penicillin and                                                                          |                                                                      |                                                                                                                       |
|                          | Gentamicin                                                                              |                                                                      |                                                                                                                       |

|                      |                                                              |                                                                           |                                                                                                      |
|----------------------|--------------------------------------------------------------|---------------------------------------------------------------------------|------------------------------------------------------------------------------------------------------|
|                      | <b>Non-severe pneumonia drug</b>                             |                                                                           |                                                                                                      |
|                      | Amoxil                                                       |                                                                           |                                                                                                      |
| Drug use/application | <b>Severe pneumonia treatment</b>                            | Apply pneumonia drugs appropriately (correct dosage, frequency and route) | Score 1 if preceding clinical tasks are done according to guidelines and drugs applied appropriately |
|                      | Dose: Penicillin $\geq$ 40000-60000 IU/kg<br>Route: IV or IM |                                                                           |                                                                                                      |
|                      | Dose: Gentamicin $\geq$ 6-9 MU/kg<br>Route: IV or IM         |                                                                           |                                                                                                      |
|                      | <b>Non-severe pneumonia treatment</b>                        |                                                                           |                                                                                                      |
|                      | Dose: Amoxil $\geq$ 32-54mg/kg                               |                                                                           |                                                                                                      |
|                      |                                                              |                                                                           | <b>Maximum Pneumonia cPAQC Score=4</b>                                                               |

**Appendix Table 3: Dehydration Cumulative Correctness of Pediatric Admission Quality of Care(cPAQC) score allocation table**

| <b>Dehydration</b>       |                                                                 |                                                                        |                                                                                                                       |
|--------------------------|-----------------------------------------------------------------|------------------------------------------------------------------------|-----------------------------------------------------------------------------------------------------------------------|
| <b>Domain</b>            | <b>Domain details</b>                                           | <b>Clinical task</b>                                                   | <b>Scoring criteria</b>                                                                                               |
| Primary assessment       | <i>History of diarrhea OR Vomits</i>                            | Assessment and documentation of history of diarrhea or vomits          | Score 1 if all items in Primary & secondary domains are documented                                                    |
| Secondary assessment     | Capillary refill                                                | Assess all signs and document                                          |                                                                                                                       |
|                          | Temperature gradient                                            |                                                                        |                                                                                                                       |
|                          | Sunken eyes                                                     |                                                                        |                                                                                                                       |
|                          | Skin pinch                                                      |                                                                        |                                                                                                                       |
|                          | Ability to drink                                                |                                                                        |                                                                                                                       |
| AVPU                     |                                                                 |                                                                        |                                                                                                                       |
| Complete assessment      | Primary & secondary assessment                                  | Complete documentation of primary and secondary signs of illness       |                                                                                                                       |
| Diagnosis classification | <b>Severe dehydration</b>                                       | Use clinical signs to classify dehydration severity levels accordingly | Score 1 if there is a complete assessment of signs and pneumonia severity classification done according to guidelines |
|                          | <i>History of diarrhea OR Vomits plus all of the following:</i> |                                                                        |                                                                                                                       |
|                          | Inability to drink OR AVPU<A                                    |                                                                        |                                                                                                                       |
|                          | Skin pinch >=2 seconds                                          |                                                                        |                                                                                                                       |
|                          | Sunken eyes                                                     |                                                                        |                                                                                                                       |
|                          | <b>Some dehydration no shock</b>                                |                                                                        |                                                                                                                       |
|                          | <i>History of diarrhea OR Vomits plus all of the following:</i> |                                                                        |                                                                                                                       |
|                          | Can drink/breastfeed                                            |                                                                        |                                                                                                                       |
|                          | Sunken eyes                                                     |                                                                        |                                                                                                                       |
|                          | Skin pinch 1-2 seconds                                          |                                                                        |                                                                                                                       |
|                          | <b>No dehydration</b>                                           |                                                                        |                                                                                                                       |
|                          | <i>History of diarrhea OR Vomits plus any of the following:</i> |                                                                        |                                                                                                                       |
|                          | Sunken eyes AND Skin pinch is immediate                         |                                                                        |                                                                                                                       |
| Skin pinch 1-2 seconds   |                                                                 |                                                                        |                                                                                                                       |
| Drug choice              | <b>Severe dehydration drug</b>                                  |                                                                        |                                                                                                                       |

|                      |                                                                                                                                                                                                                                                                                     |                                                                                |                                                                                                      |
|----------------------|-------------------------------------------------------------------------------------------------------------------------------------------------------------------------------------------------------------------------------------------------------------------------------------|--------------------------------------------------------------------------------|------------------------------------------------------------------------------------------------------|
|                      | Ringers (Hartman's) or Normal saline or ORS (no IV line)                                                                                                                                                                                                                            | Dehydration drug prescriptions                                                 | Score 1 if preceding clinical tasks and drug(s) are prescribed according to guidelines               |
|                      | <b>Some dehydration drug</b>                                                                                                                                                                                                                                                        |                                                                                |                                                                                                      |
|                      | ORS                                                                                                                                                                                                                                                                                 |                                                                                |                                                                                                      |
|                      | <b>No dehydration drug</b>                                                                                                                                                                                                                                                          |                                                                                |                                                                                                      |
|                      | ORS                                                                                                                                                                                                                                                                                 |                                                                                |                                                                                                      |
| Drug use/application | <b>Severe dehydration treatment</b>                                                                                                                                                                                                                                                 | Apply dehydration drugs appropriately (correct dosage, frequency and duration) | Score 1 if preceding clinical tasks are done according to guidelines and drugs applied appropriately |
|                      | Drug=<br>Ringers(Hartman's)/Normal saline<br><br>Step 1 & 2<br>Dosage= 100mls/kg $\pm$ 20% ( $\geq$ 80 & $\leq$ 120)<br>Duration= 3Hrs $\geq$ 12m old or 6Hrs $\leq$ 12m old<br><br><b>OR</b><br>Drug= ORS<br>Dosage=120mls/kg $\pm$ 20% ( $\geq$ 96 & $\leq$ 144)<br>Duration=6hrs |                                                                                |                                                                                                      |
|                      | <b>Some dehydration treatment</b>                                                                                                                                                                                                                                                   |                                                                                |                                                                                                      |
|                      | Dosage ORS: $\geq$ 60 - $\leq$ 90<br>Duration: 4Hrs                                                                                                                                                                                                                                 |                                                                                |                                                                                                      |
|                      | <b>No dehydration treatment</b>                                                                                                                                                                                                                                                     |                                                                                |                                                                                                      |
|                      | Dosage ORS: $\geq$ 8 - $\leq$ 12                                                                                                                                                                                                                                                    |                                                                                |                                                                                                      |
|                      |                                                                                                                                                                                                                                                                                     |                                                                                |                                                                                                      |
|                      |                                                                                                                                                                                                                                                                                     |                                                                                | <b>Maximum dehydration cPAQC Score=4</b>                                                             |
